# Supplementary material for: What do we actually want to experience? A computational metric for assessing reward values
Source: Research Square preprint supplement (doi:10.21203/rs.3.rs-5875678/v1), 2025-02-17
Supplement: Supplementary file 1 [file c66e92be809244087b4a91cd.docx]

**Supplementary Online Material – Review for:**

What do we actually want to do? A computational metric for assessing reward value

**Study 1**

**Picture information**

All of the neutral and negative pictures and 120 of the 136 positive images came from the Geneva Affective Picture Database (GAPED; Dan-Glauser & Scherer, 2011). The two sets were virtually identical in their positive ratings (Ms = 89.88, 89.69), neutral ratings (Ms = 54.53, 54.60) and negative ratings (Ms = 15.52, 15.46) all ts < .21, ps > .84, with the positive ratings significantly higher than the neutral ratings, ts(39) > 25.7, ps < .001, and the neutral ratings significantly higher than the negative ratings, ts(39) > 29.43, ps < .001. Because there were not enough positive images in the GAPED database, we supplemented them with 16 images (8 for each set) from the International Affective Picture System (IAPS; Lang et al., 1997). Picture sets were counterbalanced across participants for the two conditions (familiar, novel).

**Model selection**

Q-Learning models can have a variety of potential parameters, such as forgetting parameters, valence partition parameters, and temporal difference parameters (Katahira et al., 2017; Kishida & Sands, 2021). We chose to assess the same parameters as Katahira, 2015, except we could not partition the Q values into separate valences given that we were not pre-specifying which outcomes had positive and negative values and instead measured whether they did or not. Nevertheless, we still performed model section (see below), which confirmed that the 5-parameter model (, provided greater predictive value than models with fewer parameters and models in which the k-values were replaced with the explicit emotion ratings, which supports the utility of assessing cRV for understanding emotion-based choices.

**Table S1**

*HBA RL Parameters for Familiar and Novel Picture Trials*

| Parameter | 80 Trial  *M (SD)* | 40 Trial  *M (SD)* |
| --- | --- | --- |
|  | .19(.24) | .20(.23) |
|  | .19(.25) | .18(.22) |
|  | 1.54(.46) | 1.74(.12) |
|  | 1.65(.39) | 1.65(.25) |
|  | .33(.19) | .49(.38) |
|  | -.60(.30) | -.63(.24) |
|  | .11(.08) | .32(.15) |
|  | -.65(.34) | -.69(.30) |

*Note. N* = 137. Pos = positive picture trials, neg = negative

picture trials. Fam = familiar trials, Nov = novel trials.

**40 trial version**

In the 40 trial version, we ran the kRL modelling but only analyzed the first 40 trials of the task. The Elpd_loo for the 40 trial version abκ model was -2789.1 (SE = 97.7), which when adjusted for the number of trials (loo/trial = -69.73) is actually a little better than for the full 80 trial (loo/trial = -75.4) version. This suggests that the 40 trial version could be a viable alternative for investigators needing a shorter version.

**cRV results.** Next, to test the hypothesis that cRV reflects reward differences between positive and negative emotional stimuli and to explore whether familiarity moderates these cRV differences, we conducted a 2 (Valence: positive, negative) x 2 (Familiarity: familiar, novel) ANOVA on the cRV parameters (κ values) from the 40-trial version and explored interactions with paired t-tests. As hypothesized there was a strong main effect of Valence, *F*(1,136) = 1072.77, *p <*.001, ηp2 = .89, with higher cRV for positive pictures (*M* = .41, CI95 [.37, .45]) than for negative pictures (*M* = -.66, CI95 [-.70, -.62]). There was also a main effect of Familiarity, *F*(1,136) = 51.78, *p <*.001, ηp2 = .27, but both of these were qualified by an interaction of Valence and Familiarity, *F*(1,136) = 5.94, *p =.*042, ηp2 = .016. Decomposing the interaction shows that although the cRV for familiar pictures was significantly greater than the cRV for novel pictures for both positive and negative pictures, this difference was much greater for the positive pictures (*Mfamiliar* = .50, CI95 [.43, .56]; *Mnovel* = .32, CI95 [.30, .35]), *t*(136) = 5.44, *p <*.001, CI95 [.11, .23], d = .47, than for the negative pictures (*Mfamiliar* = -.63, CI95 [-.67, -.59]; *Mnovel* = -.69, CI95 [-.74, -.64]), *t*(136) = 2.72 *p =*.007, CI95 [.02, .11], d = .23.

**Study 2**

**40 trial version results**

To test our hypothesis that attractive faces would predict higher cRV than less attractive faces and to explore how this effect may be moderated by attraction preference and face gender, we conducted a 2 (Attraction Preference: gynephilic [male attracted] or androphilic [female attracted]) by 2 (Face Gender: female, male) x 2 (Face Attractiveness: high or low) mixed ANOVA designs with Attraction Preference as the between-subjects factor, Face Gender and Face Attractiveness as the within-subjects factors, and the k-values as the dependent variable. Because the k-values for each face gender category were separately estimated and initialized, we followed up interactions with t-tests and ANOVAs that compared effects within each face gender category.

Supporting our primary hypothesis, there was a significant main effect of Face Attractiveness, *F*(1, 134) = 121.00, *p <*.001, ηp2 = .475, in which cRV for high attractiveness faces was significantly higher (*M =* .12, CI95 [.07, .16]) than the CRV for low attractiveness faces (*M =* -.34, CI95 [-.39, -.28]). There were also a significant main effect of Face Gender, *F*(1,134) = 229.44, *p <*.001, ηp2 = .631, and significant 2-way interactions of Attraction Preference and Face Gender, *F*(1, 134) = 4.68, *p =*.032, ηp2 = .034, and Face Attractiveness and Face Gender, *F*(1, 134) = 4.27, *p =* .041, ηp2 = .031. Unlike the 80 trial version, these effects were not qualified by a significant 3-way interaction of Attraction Preference, Face Attractiveness, and Face Gender, *F*(1, 134) = 1.50, *p =*.222, ηp2 = .011.

The interaction of Attraction Preference and Face Gender seemed to be due to those attracted to males showing slightly higher cRV to female faces (*M* = .11, CI95 [.04, .18]) than those participants attracted to females (*M* = .03, CI95 [-.03, .08]), *t*(134) = 1.91, p = .23, CI95 [-.00, .17]), whereas there was virtually no difference between the cRV for male faces (*M*maleatt = -.29, CI95 [-.34, -.25]; *M*fematt = -.28, CI95 [-.32, -.24]); *t*(134) = .51, p = .957, CI95 [-.07, .04])). The interaction of Face Attractiveness and Face Gender seemed to be due to a slightly (although both comparisons were highly significant) greater difference between high (*M* = .33, CI95 [.26, .39]) and low attractive female faces (*M* = -.19, CI95 [-.27, -.11]), *t*(134) = 8.92, p < .001, CI95 [-.64, -.41]), than between high (*M* = -.09, CI95 [-.14, -.04]) and low attractive male faces(*M* = -.48, CI95 [-.54, -.42]), *t*(134) = 8.54, p < .001, CI95 [-.48, -.30]), with high attractive female faces the only category that exhibited significantly higher cRV than the mid-attractive faces.

**Table S2**

*HBA RL Parameters for Both Female and Male Face-Choice Tasks*

| Parameter | Gynephilic (Female Attracted) | | Androphilic (Male Attracted) | |
| --- | --- | --- | --- | --- |
|  | *80-trial*  *M(SD*) | *40-trial*  *M(SD*) | *80-trial*  *M(SD*) | *40-trial*  *M(SD*) |
|  | 0.16(.16) | .17(.14) | 0.17(.18) | .17(.15) |
|  | 0.11(.15) | .11(.13) | 0.15(.18) | .14(.14) |
|  | 2.52(.76) | 2.45(.29) | 2.35(.66) | 2.40(.24) |
|  | 2.95(.68) | 2.92(1.48) | 2.92(.77) | 3.03(1.44) |
|  | 0.41(.38) | .34(40) | 0.33(.43) | .32(.35) |
|  | -0.28(.60) | -.29(.47) | -0.03(.54) | -.09(.46) |
|  | -0.06(.28) | -.07(.25) | -0.06(.24) | -.11(.31) |
|  | -0.33(.47) | -.49(.39) | -0.37(.41) | -.47(.26) |

*Note. N* = 144 (*n* = 83 for those attracted to females; *n* = 61 for those attracted to males). Subscripts for parameters represent the face trials presented to the participants (i.e., fem is female face-choice trials and male is male face-choice trials).

**References**

Dan-Glauser, E. S., & Scherer, K. R. (2011). The Geneva affective picture database (GAPED): A new 730-picture database focusing on valence and normative significance. *Behavior Research Methods*, *43*(2), 468–477. https://doi.org/10.3758/s13428-011-0064-1

Katahira, K., Yuki, S., & Okanoya, K. (2017). Model-based estimation of subjective values using choice tasks with probabilistic feedback. *Journal of Mathematical Psychology*, *79*, 29–43. https://doi.org/10.1016/j.jmp.2017.05.005

Kishida, K. T., & Sands, L. P. (2021). A Dynamic Affective Core to Bind the Contents, Context, and Value of Conscious Experience. In C. E. Waugh & P. Kuppens (Eds.), *Affect Dynamics* (pp. 293–328). Springer Nature.

Lang, P. J., Bradley, M. M., & Cuthbert, B. N. (Directors). (1997). *International Affective Picture System (IAPS): Technical Manual and Affective Ratings*.

Vehtari, A., Gelman, A., & Gabry, J. (2017). Practical Bayesian model evaluation using leave-one-out cross-validation and WAIC. *Statistics and Computing*, *27*(5), 1413–1432. https://doi.org/10.1007/s11222-016-9696-4
